# The Structural Basis for Gag Non-Cleavage Site Mutations in Determining HIV-1 Viral Fitness

Firdaus Samsudin<sup>a</sup>, Samuel Ken-En Gan<sup>a,c,d,\*</sup>, and Peter J. Bond<sup>a,b,\*</sup>

<sup>a</sup>Bioinformatics Institute (A\*STAR), 30 Biopolis Street, #07-01 Matrix, Singapore 138671, Singapore.

<sup>b</sup>Department of Biological Sciences, National University of Singapore, 14 Science Drive 4, Singapore 117543, Singapore.

<sup>c</sup>Antibody & Product Development Lab – Large Molecule Innovation, Experimental Drug Development Centre (A\*STAR), Singapore 138670.

<sup>d</sup>p53 Laboratory (A\*STAR), Singapore 138648

\*To whom correspondence should be addressed:

Email: [peterjb@bii.a-star.edu.sg](mailto:peterjb@bii.a-star.edu.sg)

Email: [samuel\\_gan@eddc.a-star.edu.sg](mailto:samuel_gan@eddc.a-star.edu.sg)

23 **Abstract**

24 The high mutation rate in retroviruses is one of the leading causes of rampant drug  
25 resistance and the emergence of novel infectious diseases. In human  
26 immunodeficiency virus type-1 (HIV-1), synergistic mutations in its protease and the  
27 protease substrate – the Group-specific antigen (Gag) polyprotein – work together to  
28 confer drug resistance against protease inhibitors and compensate the effects of the  
29 mutations on viral fitness. Some Gag mutations have been reported to restore Gag-  
30 protease binding, yet most Gag-protease correlated mutations occur outside of the  
31 Gag cleavage site. To rationalize this, we report multiscale modelling approaches to  
32 investigate various sequentially cleaved Gag products in the context of clinically  
33 relevant mutations that occur outside of the cleavage sites. Simulations of the  
34 complete oligomeric structure of the largest Gag proteolytic product in its viral  
35 membrane-bound state revealed how non-cleavage site mutations can directly interact  
36 with cleavage site residues to affect their local environment, facilitated by  
37 conformational changes upon lipid interaction. Mutations in the matrix domain led to  
38 the enrichment of phosphatidylinositol bisphosphate (PIP2) lipids – whose association  
39 is essential for Gag targeting and assembly on the plasma membrane – facilitated by  
40 creation of novel PIP2 binding sites. Additional studies of the mature CA hexamer  
41 suggest that some mutations can modulate recruitment of cyclophilin A (CypA) into  
42 the mature virion, as well as stabilise the oligomerisation of the viral core. Collectively,  
43 our results reveal that non-cleavage site mutations have far-reaching implications  
44 outside of Gag proteolysis, with important consequences for drugging Gag maturation  
45 intermediates and tackling protease inhibitor resistance.

46

47

## 48 **Introduction**

49 RNA viruses are among the most adaptable pathogens threatening human health.  
50 With their high mutation rates<sup>1</sup>, they are orders of magnitude more adaptable than  
51 most DNA-based organisms<sup>2</sup>, resulting in their ability not only to escape the immune  
52 system and become drug resistant, but jump across host species boundaries causing  
53 emerging infectious diseases that could turn into global pandemics<sup>3-6</sup>. HIV-1  
54 represents one of the most extensively characterized RNA viruses, with mathematical  
55 modelling showing that many clinically established drug resistance mutations could  
56 occur within the first replication cycle<sup>7</sup>, and every single possible point mutation could  
57 occur thousands of times within a single day, leading to rapid drug resistance<sup>8</sup>, hence  
58 leading to the need to treat HIV patients with a cocktail of multiple antiviral drugs with  
59 different mechanism. Understanding the role of these mutations is thus an imperative  
60 aspect in novel antiviral drug development.

61 Most clinically approved HIV treatments target various key enzymes that are  
62 critical to the life cycle of the virus, most prominently the HIV-1 protease. HIV-1  
63 protease cleaves the structural polyproteins Gag and Gag-Pol into their mature  
64 components to create the infectious virion. To inhibit this, protease inhibitors (PIs) bind  
65 competitively to the viral protease to prevent Gag substrate proteolysis and virion  
66 maturation. PIs form a major component of the highly active antiretroviral therapy  
67 (HAART) in the management of HIV; however, emerging mutations in HIV-1 protease  
68 often render PIs ineffective, with some mutations even leading to cross-drug  
69 resistance<sup>9</sup>. This is further aggravated by synergistic mutations on the Gag polyprotein  
70 itself<sup>10,11</sup>, making Gag an attractive drug target in addition to the protease<sup>10</sup>. Gag  
71 mutations around the protease cleavage site have been shown to restore Gag-  
72 protease binding by introducing new chemical interactions and inducing subtle  
73 conformational changes that compensate for the loss of affinity due to the mutations  
74 on HIV-1 protease<sup>12</sup>. Apart from mutations around the protease cleavage sites, Gag  
75 also harbours mutations away from these regions, many of which have been shown  
76 to directly contribute towards PI resistance<sup>13,14</sup>. To date, the role of these non-cleavage  
77 site mutations is largely unknown, with some analysis pointing to allosteric  
78 communication<sup>15</sup>. In this study, we aim to use structural modelling and simulations to  
79 decipher how Gag non-cleavage site mutations contribute towards the overall fitness  
80 of the HIV-1 virus.

81           The HIV-1 Gag polyprotein is a 500 amino acid precursor protein containing the  
82 matrix (MA), capsid (CA), nucleocapsid (NC) and P6 domains, as well as two spacer  
83 peptides, SP1 and SP2. During the late phase of the HIV-1 replication cycle, Gag is  
84 sequentially cleaved by the protease enzyme into these domains (Figure S1), which  
85 subsequently form an infectious mature virion<sup>16</sup>. Each domain plays a specific role  
86 during maturation; for example, the MA domain drives full-length Gag to assemble at  
87 the plasma membrane of the host cell, while the CA and NC domains encapsulate the  
88 viral RNA genome. The CA domain also interacts with CypA, which is a host cell  
89 protein that is incorporated into the virion and is essential for capsid uncoating<sup>17,18</sup>.  
90 Due to its functional significance in the HIV-1 life cycle, Gag is an attractive target for  
91 therapeutic agents and to date, several drugs that target the CA domain have been  
92 identified<sup>19</sup>. Nevertheless, a Gag inhibitor is yet to be clinically approved. For example,  
93 Bevirimat is a drug candidate that stabilises the immature Gag lattice by preventing  
94 proteolysis between the CA and SP1 domains<sup>20</sup>. A clinical trial, however, showed a  
95 reduced response amongst certain patients due to a high prevalence of Gag  
96 polymorphisms and resistant mutations<sup>21,22</sup>, which highlights the importance of  
97 understanding the role of Gag non-cleavage site mutations.

98           Over the past few years, integrative modelling and molecular dynamics (MD)  
99 simulations, in tandem with advances in structural biology, have provided valuable  
100 insights into the molecular mechanism underlying viral function and dynamics<sup>23</sup>. In the  
101 study of HIV-1, this ranges from multiscale simulations of the entire viral capsid shell  
102 and its assembly pathways<sup>24–29</sup>, to simulations of individual Gag proteins with host cell  
103 components, such as the CA domain with CypA<sup>30</sup>, kinesin-1 adaptor protein FEZ1<sup>31</sup>  
104 and inositol hexakisphosphate (IP6)<sup>32</sup>, as well as the MA domain with a model plasma  
105 membrane<sup>33</sup>. A previous structural model of full-length monomeric HIV-1 Gag revealed  
106 allosteric communications between non-cleavage site mutations and the first Gag  
107 cleavage site<sup>15</sup>, providing a glimpse into how residues far away from the protease  
108 cleavage site could affect proteolysis. However, this model did not take into account  
109 *in vivo* Gag oligomerisation, which is instrumental during virus particle maturation.  
110 Crystal structures show that the MA domain exists as a trimer<sup>34</sup>, whilst the CA domain  
111 forms a hexamer<sup>35</sup>. An electron microscopy (EM) study of the MA protein in a PIP2  
112 containing membrane showed that under higher order conditions, it organizes into  
113 hexamers-of-trimers<sup>36</sup>.

114 Structural models of sequentially cleaved Gag are imperative for understanding  
115 the conformational changes involved upon proteolysis, which may improve our overall  
116 knowledge of Gag mutations and potential drugging of these intermediates. Using  
117 available structures of HIV-1 Gag domains, we built an integrative model of the  
118 complete oligomeric Gag polyprotein cleavage product (Figure 1) bound to a viral  
119 membrane model (Figure 2). Based on coarse grained (CG) MD simulations using the  
120 Martini forcefield of the wild-type (WT) and mutant Gag variants, supported by careful  
121 calibration against atomic-resolution sampling, we found that non-cleavage site  
122 mutations can interact with cleavage site residues and potentially alter their local  
123 environment, while mutations on the MA domain confer stronger binding to the plasma  
124 membrane. Subsequent all-atom MD simulations of the CA domain revealed how  
125 mutations in this region modulate CypA recruitment as well as stabilise oligomer  
126 formation. Overall, our study uncovers how these distant mutations can affect various  
127 processes during HIV-1 viral maturation and contribute towards its overall fitness.  
128  
129

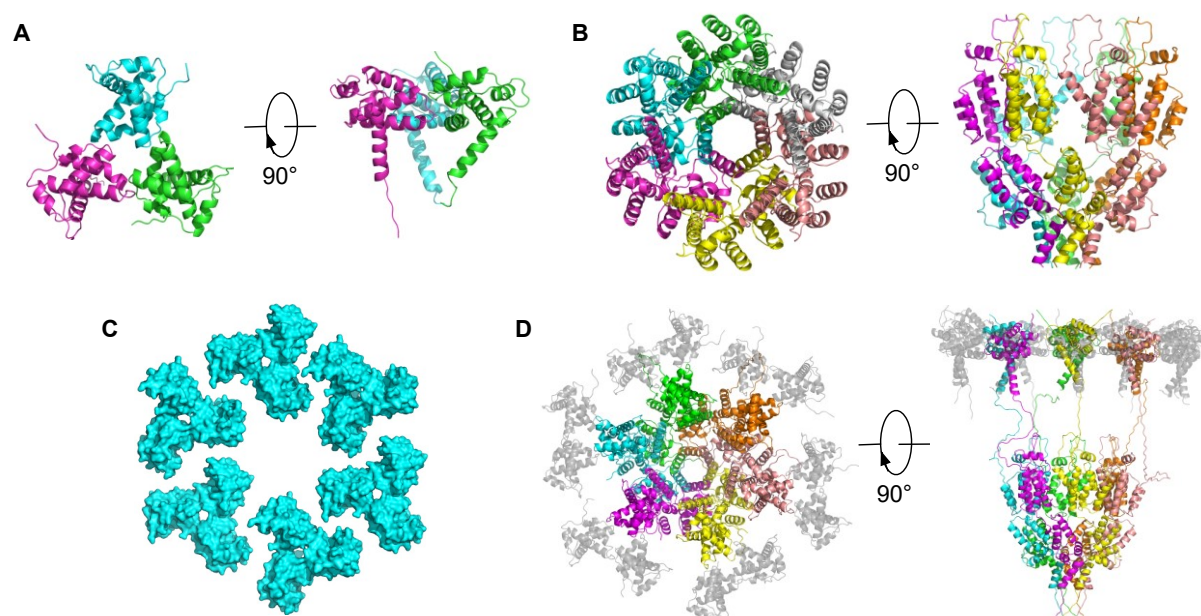

130  
131  
132 **Figure 1: Modelling HIV-1 Gag MA-CA-SP1.** (A) The crystal structure of the MA trimer (PDB: 1HIW).  
133 (B) The crystal structure of the immature CA hexamer (PDB: 5L93). (C) The hexamer of trimers model  
134 for the MA domains as supported by EM. (D) A model of the MA-CA-SP1 hexamer. The central subunits  
135 of the MA trimers are connected to the CA domains and coloured as in (B), whereas the peripheral MA  
136 subunits are coloured grey.  
137

## 138 **Results**

### 139 ***Membrane dynamics of the HIV-1 Gag MA-CA-SP1 polyprotein***

140 The Gag polyprotein is sequentially cleaved by HIV-1 protease during viral maturation  
141 (Figure S1). The first cleavage occurs between the SP1 and NC domains to produce  
142 the MA-CA-SP1 polyprotein, which represents the largest Gag cleavage product. A  
143 hexameric model of the HIV-1 Gag MA-CA-SP1 polyprotein was built using the crystal  
144 structures of the MA trimer<sup>34</sup> and CA hexamer<sup>35</sup>, with the intervening linker between  
145 the MA and CA domains constructed *ab initio* (see Methods section for further details)  
146 (Figure 1). The crystal structure of the immature CA hexamer was aligned with six  
147 copies of MA trimers (hexamers-of-trimers) following the arrangement observed in  
148 membrane bilayers<sup>36</sup>. Gatanaga et al. discovered PI-resistant Gag variants with non-  
149 cleavage site mutations mapped to the MA-CA-SP1 complex (Table S1, Figure S1)<sup>14</sup>.  
150 These include seven unique mutations, with five located in the MA domain and two in  
151 the CA domain. We generated models for three variants (specifically variant numbers  
152 3, 6, and 7, as outlined in Tables S1-S2) that cover all of these seven unique mutations  
153 (Figure 2A). To understand the conformational dynamics of the polyprotein and the  
154 potential roles of these non-cleavage site mutations, we performed four independent  
155 15  $\mu$ s CG MD simulations of the MA-CA-SP1 model bound to a realistic HIV-1  
156 membrane model (Table S2). The membrane model contained phosphatidylcholine  
157 (PC), phosphatidyl ethanolamine (PE) and phosphatidylserine (PS) lipids, as well as  
158 PIP2, sphingomyelin and cholesterol, as determined by a previous lipidomics study<sup>37</sup>  
159 (see Methods section for further details), whilst the MA domain N-terminus was  
160 myristoylated (Figure 2B).

161 As previously predicted<sup>33</sup>, the myristate group on the N-terminal glycine residue  
162 of MA domain effectively anchored the protein to the membrane. Within the first few  
163 nanoseconds, the linker connecting the MA and CA domains contracted, effectively  
164 pulling the CA-SP1 domain towards the membrane (Figure 2B). To verify these  
165 domain-domain dynamics observed during CG sampling, we also performed four  
166 independent 500 ns atomistic simulations of the MA-CA-SP1 monomer with positional  
167 restraints applied to the backbone atoms of lipid binding residues to mimic membrane  
168 association. Additionally, we also conducted CG simulations of the same monomeric  
169 system. Both of these additional sets of simulations showed a contraction of the MA-  
170 CA linker, resulting in a similar distribution of distances between the MA and CA  
171 domains compared to the CG hexamer simulations (Figure S2). While the atomistic

172 simulations initially sampled a wider spread of distances, after around 300 ns this  
173 converged to 4-6 nm, reproducing the CG distributions. This validates our CG hexamer  
174 model and shows that the linker region does not maintain an extended conformation,  
175 but rather contracts to allow direct contact between the MA and CA domains.

176

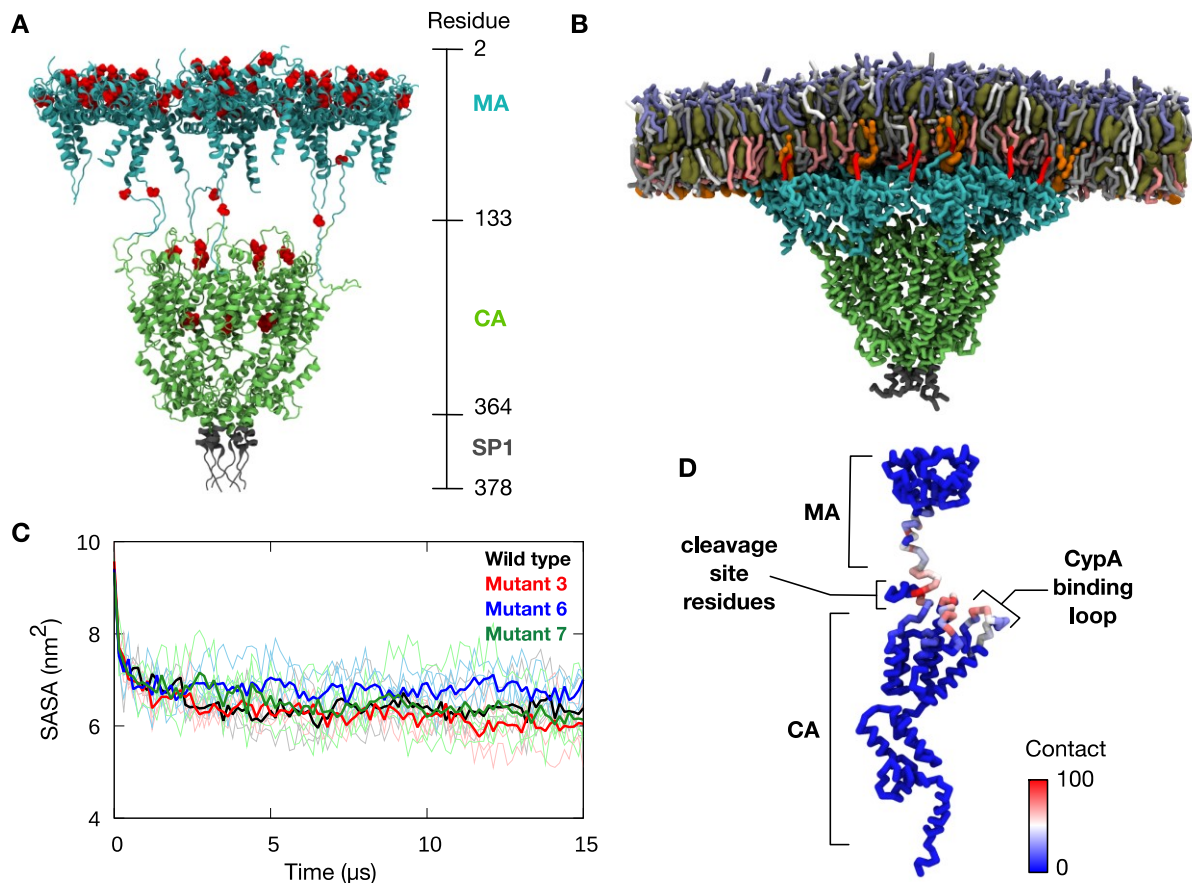

177

178 **Figure 2: HIV-1 Gag MA-CA-SP1 model.** (A) An atomic model of MA-CA-SP1 hexamer built using the  
179 crystal structures of MA trimer<sup>34</sup> and immature CA hexamer<sup>35</sup>, shown in cartoon representation. The  
180 MA domain (cyan), CA domain (green), and SP1 domain (dark grey) are shown in different colours.  
181 The positions of seven unique non-cleavage site mutations<sup>14</sup> are shown in red. Residue numbering for  
182 each domain and their approximate positions are shown on the right. (B) The final snapshot from one  
183 of the 15 μs CG simulations of a membrane-bound WT MA-CA-SP1 hexamer showing contraction of  
184 the linker connecting MA and CA domains. Protein backbone and lipids are shown in licorice  
185 representation. N-terminal myristate (red), PC (white), PE (light grey), PS (pink), PIP2 (orange),  
186 sphingomyelin (purple) and cholesterol (dark green) are shown in different colours. (C) Solvent  
187 accessible surface area (SASA) of the MA-CA cleavage site region (residue 128-137) over the course  
188 of 15 μs CG simulations. Thin lines represent the six individual subunits and thick lines show the running  
189 average. Data were averaged over four independent simulations. (D) Average percentage of contact  
190 made by the cleavage site residues with the rest of the protein, mapped onto the backbone of a single

191 subunit of MA-CA-SP1 from the WT simulations. Data were averaged over six subunits and four  
192 independent simulations.

193

### 194 ***Interaction between cleavage site residues and non-cleavage site mutations***

195 The linker contraction described above resulted in a decrease in solvent accessibility  
196 of the cleavage site residues between the MA and CA domains from  $\sim 10 \text{ nm}^2$  to  $\sim 6$   
197  $\text{nm}^2$  (Figure 2C). After the first round of Gag proteolysis, the MA domain is cleaved off  
198 from the MA-CA-SP1 polyprotein, and the P6 domain is cleaved from the NC-SP2-P6  
199 polyprotein (Figure S1). However, the rate at which the former occurs is noticeably  
200 slower than that of the latter<sup>38</sup>. Our simulations suggest that this may be caused by  
201 the reduction in exposure of the cleavage site, due to the contraction of the linker  
202 region between MA and CA domains. This linker contraction also led to the cleavage  
203 site residues interacting with neighbouring subdomains, predominantly with the C-  
204 terminal helix of the MA domain and several inter-helical loops on the CA domain,  
205 including the CypA binding loop (Figure 2D).

206 Two PI-resistant mutations were identified at the interaction sites – G123E and  
207 H219Q. To understand how these mutations may affect the cleavage site residues,  
208 contact analysis was performed between the cleavage site residues and these two  
209 specific positions in the WT and mutant proteins, particularly focusing on potential  
210 inter- and intra-subunit interactions. Due to their close proximity, we found that the  
211 residue at position 123 made contact primarily with the N-terminal portion of the  
212 cleavage site from the same Gag subunit (Figure 3A and 3B). Both WT (glycine) and  
213 mutant (glutamate) residues showed a similar percentage of contact over the course  
214 of the simulations. “Back-mapping” of CG simulation snapshots to transform them into  
215 atomic resolution suggested that a glutamate residue at this position may interact with  
216 polar residues on the cleavage site, such as Q130 and Y132 (Figure 3C). We  
217 performed three independent 200 ns atomistic simulations of a single MA-CA-SP1  
218 subunit to refine the back-mapped structure, and indeed found that the glutamate  
219 residue interacted primarily with Y132 (Figure S3). Additionally, the residue also  
220 contacted residues N131 and Q130. In contrast, a glycine residue at this position  
221 interacted primarily with V128 and S129. Given the change in the overall size and  
222 charge of the residue in the WT and mutants (from small and neutral to large and  
223 acidic), the G123E mutation alters the accessibility and electrostatic properties in the



224 vicinity of the cleavage site and would therefore be expected to directly interfere with  
225 proteolysis.

226 While the interactions of G123E with the cleavage site residues occur within  
227 the same subunit of the MA-CA-SP1 polyprotein, inter-subunit interactions were  
228 observed for H219, whereby this residue contacted the cleavage site of an adjacent  
229 subunit (Figure 3D). The frequency of such interactions, however, was notably lower  
230 than that displayed by G123E, and interestingly, mutation to glutamine resulted in a  
231 reduced contact with the cleavage site (Figure 3E). Back-mapping to atomistic  
232 representation suggested potential for interactions with polar residues such as N131  
233 and N137 (Figure 3F). Atomistic simulations of two adjacent MA-CA-SP1 subunits  
234 using the back-mapped structure showed that histidine at this position made  
235 intermittent contacts with I134, V135, Q136 and N137, whilst glutamine interacted  
236 primarily with Y132 (Figure S3). Given that the WT histidine may potentially become  
237 protonated, it may affect local electrostatic surface properties of the Gag cleavage site  
238 to modulate the catalytic efficiency of the protease enzyme.

239 Overall, our data suggest that even though these mutations occur far from the  
240 protease binding site, they can physically interact with the cleavage site residues,  
241 either within the same Gag subunit or with a neighbouring subunit, as the linker region  
242 between MA and CA domain contracts following the first proteolytic cleavage.

243

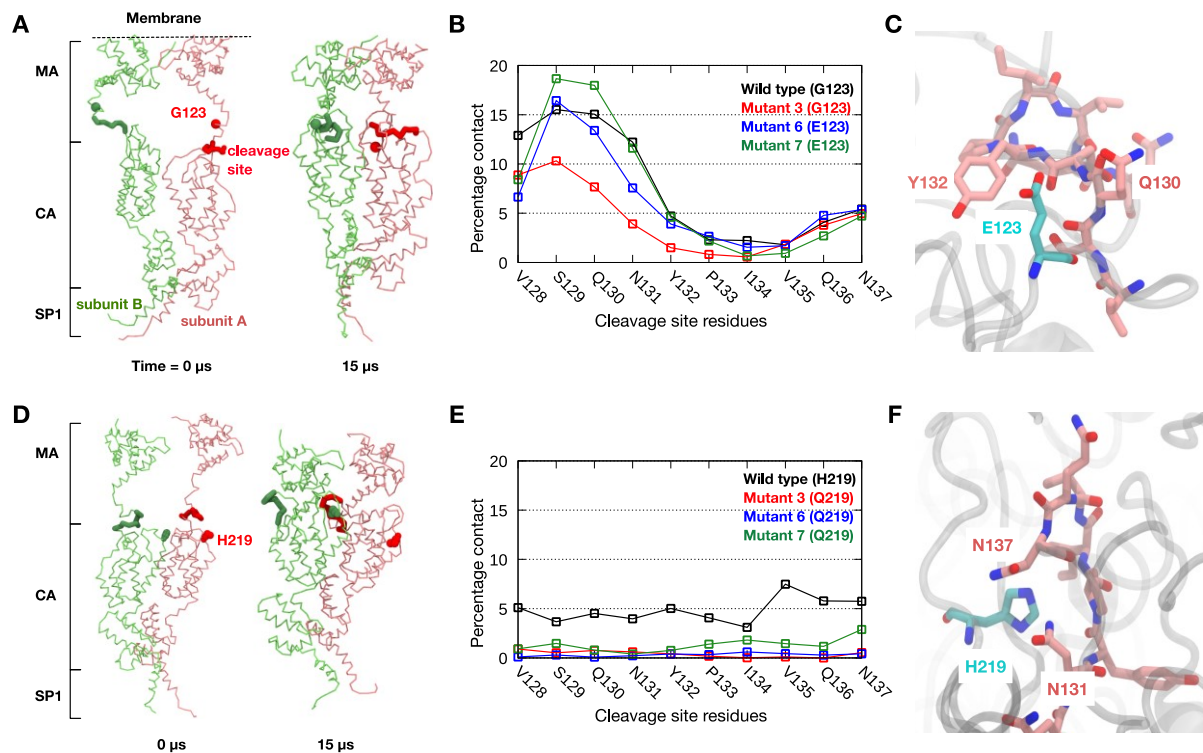

244  
 245 **Figure 3: Interactions between non-cleavage site mutations and cleavage site residues.** (A)  
 246 Snapshot at the beginning and end of the CG simulations of WT MA-CA-SP1 showing the interaction  
 247 of residue G123 (sphere representation) and cleavage site residues (thick licorice representation). Two  
 248 subunits are shown in red and green. (B) Percentage of contacts across the entire CG simulation  
 249 sampling made between G123/E123 with each of the residues of the MA-CA cleavage site. This is  
 250 averaged over the six subunits of MA-CA-SP1 and the four independent trajectories. (C) Atomistic  
 251 model, derived from the final snapshot of one of the CG simulations, highlighting E123 in mutant Gag  
 252 (cyan) and nearby cleavage site residues (pink). (D) Snapshot at the beginning and end of the CG  
 253 simulations showing the interaction between H219 from one subunit to cleavage site residues on an  
 254 adjacent subunit. (E) Contact analysis similar to (B) for H219/Q219. (F) Atomistic model derived from  
 255 the CG simulations of WT Gag highlighting H219 in WT Gag (cyan) and surrounding cleavage site  
 256 residues (pink).

257

### 258 ***Mutations in the MA domain modulate membrane binding***

259 Four of the mutations in the MA domain map onto the plasma membrane associating  
 260 surface of our model, and three mutations – E12K, E40K and L75R – involve a switch  
 261 to basic amino acids. We hypothesized that these mutations may therefore alter key  
 262 electrostatic interactions with lipids. Indeed, in the three mutant variants, there is a  
 263 notable increase in positive electrostatic charge on the membrane binding region  
 264 compared to WT (Figure S4). In the WT Gag MA domain, the positive charge is  
 265 concentrated on the peripheral region of the membrane binding surface of the MA  
 266 trimer. In the mutant variants, in particular mutants 6 and 7, the positive charge covers

267 almost the entire membrane binding surface including the central region at the  
268 interface of the MA trimer subunits.

269 Previous biochemical and structural studies showed that PIP2 is instrumental  
270 in targeting Gag to the plasma membrane of the host cell, and that it binds directly to  
271 the MA domain<sup>39,40</sup>. To understand how the changes in electrostatic surface properties  
272 caused by the PI-resistant mutations affect membrane binding, we determined the  
273 number of PIP2 lipids interacting with the MA domains throughout our CG simulations.  
274 Over the course of the 15  $\mu$ s simulations, there was a significant enrichment of PIP2  
275 lipids around the MA domain, consistently observed across all trajectories, from  
276 around 30% at the beginning of the simulations to 60-80% by the end (Figure 4A).  
277 This was due to electrostatic attraction between the anionic PIP2 headgroups and the  
278 positively charged membrane-peripheral surface of the MA domain. Interestingly, we  
279 did not observe any increment in the amount of anionic PS lipids despite its higher  
280 concentration compared to PIP2 in the membrane (Figure 4B). This may be due to the  
281 higher negative charge on the headgroups of PIP2 compared to PS lipids. PIP2  
282 enrichment around the MA domain is in agreement with previous experimental studies  
283 showing that PIP2 is responsible for anchoring HIV-1 Gag to the plasma membrane<sup>41</sup>.  
284 While both WT and mutant variants displayed PIP2 enrichment, all three mutants  
285 showed a larger degree of accumulation of PIP2 around MA. More importantly, the  
286 E40K and L75R mutations, which map around the interface of the MA trimer subunits,  
287 formed novel binding sites for PIP2 lipids (Figure 4C, 4D). Our simulations therefore  
288 suggest that these non-cleavage site mutations enhance interactions between the MA  
289 domain and PIP2 lipids, and may consequently improve membrane targeting of HIV-  
290 1 Gag during viral assembly.

291

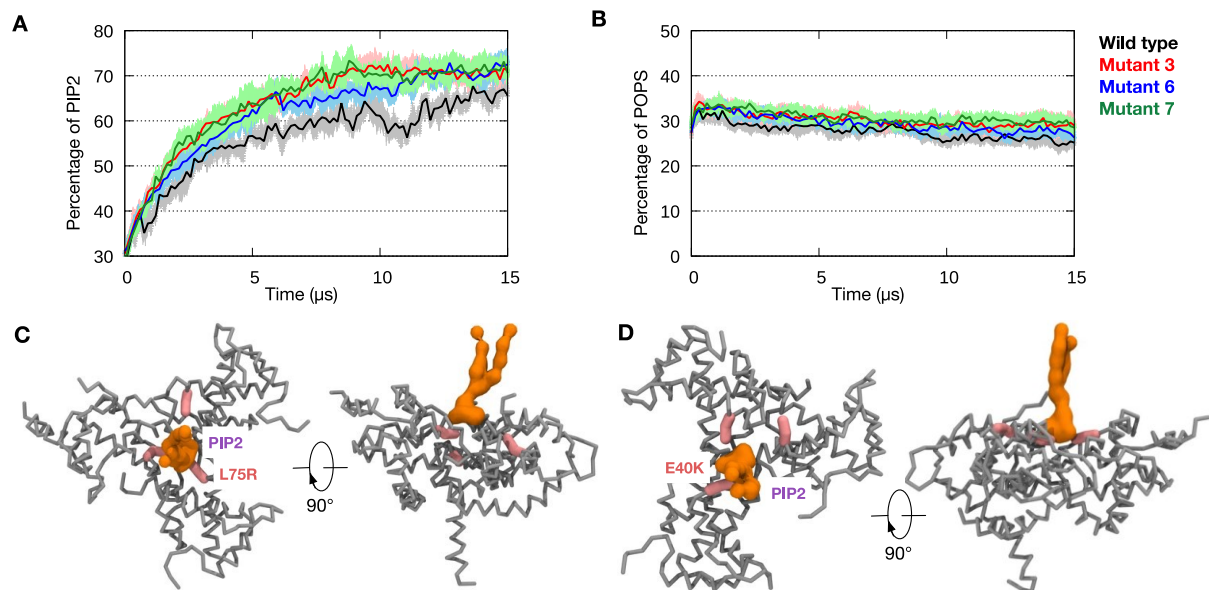

292

293 **Figure 4: PIP2 is enriched around MA domain.** (A) The percentage of PIP2 found within 0.6 nm of  
294 the MA domain during CG simulations of WT and mutant MA-CA-SP1 models. Error bars indicate  
295 standard deviation from four independent simulations. (B) The same analysis as in (A) performed for  
296 PS lipids. (C) Representative snapshots from one of the simulations of mutant 3 showing PIP2 binding  
297 at the interface of the MA trimer. The position of mutant residue, L75R, is shown in pink stick  
298 representation, whereas PIP2 is shown in orange surface representation. The rest of the MA domain is  
299 shown in grey. (D) Representative snapshot from simulations of mutant 7 showing PIP2 binding  
300 facilitated by E40K mutation, displayed in similar colours and representation as in (C).

301

### 302 ***Mutations in CypA-binding loop optimize CypA recruitment***

303 Cyclophilin A (CypA) is a host protein that is recruited by HIV-1 Gag into mature virion  
304 particles. While the exact role of CypA in HIV-1 replication remains unclear, it is  
305 thought that the prolyl isomerase activity destabilises interactions between the  
306 subunits of the CA hexamer and therefore promotes viral core disassembly during the  
307 early stage of the replication cycle<sup>18,42,43</sup>. Recruiting an optimal concentration of CypA  
308 is critical to viral fitness. At a very low CypA concentration, the HIV-1 replication rate  
309 is severely reduced as the CA subunits are tightly bound to one another, which hinders  
310 virion uncoating. On the other hand, at a very high CypA concentration, interactions  
311 between CA subunits are greatly destabilised, resulting in an unstable virion core and  
312 thereby delayed virion maturation<sup>44</sup>. CypA binds to CA via an exposed proline-rich  
313 unstructured loop region in the N-terminal domain of the latter<sup>43</sup>. Interestingly, this loop  
314 houses one of the most prevalent PI-resistant non-cleavage site mutations, H219Q.  
315 This mutation is found in all seven variants from Gatanaga et al (Table S1). To  
316 investigate the potential role of this mutation *vis-à-vis* CA-CypA interactions, we

317 performed two independent 500 ns atomistic MD simulations of the WT and H219Q  
318 mutant of the mature CA hexamer either in its CypA-free (apo) or CypA-bound state.  
319 As the imidazole ring of a histidine side chain has a pKa value that is close to  
320 physiological pH, it is possible that H219 may exist in either protonated or  
321 unprotonated form. As such, the simulations of WT CA were performed with H219 in  
322 both protonation states. IP6 has been shown to be an important assembly co-factor  
323 for HIV-1<sup>32</sup>. Crystal structures show that IP6 binds to the centre of the Gag CA  
324 hexamer and promotes the formation of the mature capsid lattice. As such, we  
325 included the IP6 molecule in all of our atomistic simulations of mature CA hexamer  
326 (see Methods section for further details).

327 Our apo simulations revealed that the CypA binding loop was the most dynamic  
328 region of the entire CA molecules (Figure 5A). No noticeable difference was found  
329 between the flexibility of this loop in simulations with the neutral H219 *versus* the  
330 H219Q mutant. Interestingly, when this histidine residue was protonated, we saw a  
331 slight increase in the RMSF values of the loop, especially around G221-P222, which  
332 is the putative substrate for the CypA rotamase activity. An increased association was  
333 observed between protonated H219 and E230, found on the opposite side of the loop  
334 (Figure 5B), as a result of salt bridge formation (Figure 5C). However, this salt bridge  
335 was intermittent (Figure 5D), such that the CypA-binding loop may adopt alternative  
336 conformational states when H219 is protonated. This means that under low pH  
337 conditions, the transition between these two states increases the overall flexibility of  
338 the loop, which consequently may make it more difficult for CypA to bind. Mutation of  
339 H219 to glutamine would therefore abolish the ability of the loop to adopt these two  
340 conformational states, reducing the loop flexibility, and facilitate initial CypA binding.  
341 This would be advantageous inside the endosome which is associated with a lower  
342 local pH, to ensure sufficient CypA binding and incorporation into the mature virion for  
343 subsequent core disassembly<sup>45</sup>.

344

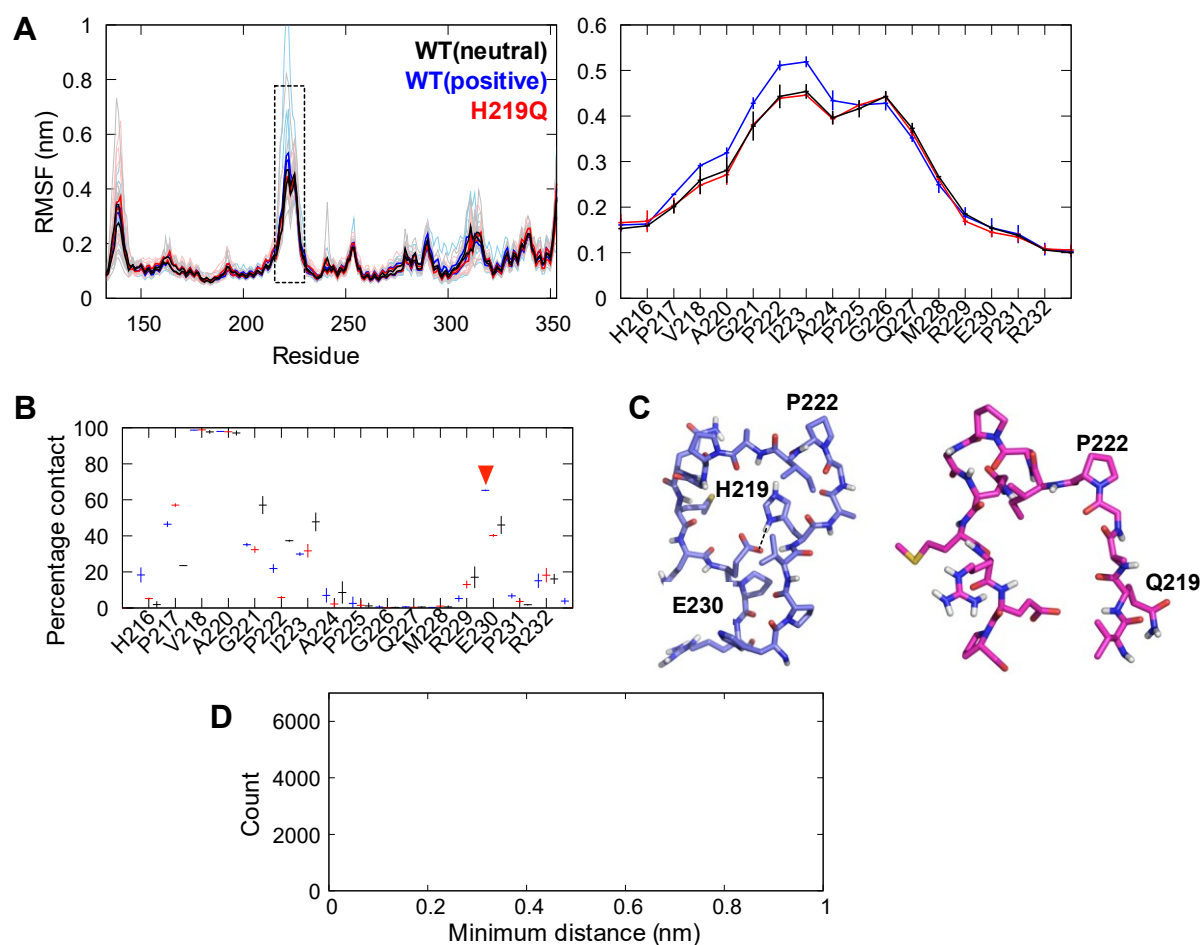

345  
 346 **Figure 5: The dynamics of CypA-binding loop.** (A) (Left) Per-residue root mean square fluctuations  
 347 (RMSF) of the CA from two independent 500 ns apo simulations. Thin lines show the RMSF of each  
 348 individual CA subunit, whilst the thick lines show the average from each simulation. Simulation with  
 349 neutral H219 is shown in black, positively charged H219 in blue, and mutant H219Q in red. Dotted box  
 350 indicates the loop region where CypA binds. (Right) Enlarged RMSF plot for CypA-binding loop.  
 351 Average from the two simulations is shown and error bars indicate standard deviations between repeat  
 352 simulations. (B) Atomic contact analysis performed between residues at position 219 and the rest of  
 353 the CypA-binding loop, including E230 (indicated by red arrowhead). Average values from two  
 354 simulations are shown and error bars indicate standard deviations between repeat simulations. Cut-off  
 355 distance for contact analysis is 0.4 nm. (C) Representative structures of the CypA-binding loop from  
 356 the simulations with positively charged H219 (left) and mutant H219Q (right) calculated using cluster  
 357 analysis (representative structures of the top clusters are shown). In the former, H219 can form a salt  
 358 bridge interaction with residue E230 found on the opposite side of the loop, represented as dotted line.  
 359 (D) The distribution of minimum distance between the hydrogen atoms bonded to the two nitrogen  
 360 atoms on the side chain of the protonated H219 and the two oxygen atoms on the side chain of E230.  
 361 Data taken from all six CA subunits and both repeat simulations.

362  
 363 Since the interactions between H219 and CypA form a part of the binding  
 364 interface<sup>43</sup>, this raises the question of whether a mutation to glutamine would

365 undermine the strength of binding. To investigate the potential effects of the H219Q  
366 mutation upon CypA binding affinity, we performed two independent 500 ns atomistic  
367 MD simulations of a mature CA hexamer with each of the subunits bound to a CypA  
368 molecule (Figure 6A). While the average buried surface area between CA and CypA  
369 in the WT and mutant CA systems were comparable throughout the simulations, we  
370 observed transient detachment of CypA molecules in two of the CA subunits from the  
371 H219Q variant (Figure 6B). Based on the crystal structure<sup>43</sup>, H219 forms hydrogen  
372 bonds with residues in the CypA active site, including N71. Our simulations revealed  
373 that this histidine residue also interacts with other polar residues such as T73, N102,  
374 and Q111 on CypA. In the H219Q mutant, the contacts made by the glutamine residue  
375 followed a largely similar pattern, although the frequency of interactions was  
376 noticeably lower compared to both neutral and protonated histidine (Figure 6C). Both  
377 of these analyses of CypA-bound CA simulations suggest that the H219Q mutation  
378 may potentially weaken CypA binding to the CA domain. This mutation is therefore  
379 likely beneficial in a CypA-rich environment whereby over-recruitment of CypA may  
380 destabilise the viral core. Taken together, the H219Q mutation on the CypA-binding  
381 loop may play a crucial role in fine-tuning the packaging of CypA into virions, especially  
382 in low endosomal pH and CypA-enriched host environments. It is worth noting that a  
383 cryo-EM study showed CypA could simultaneously bind two CA subunits from  
384 adjacent pairs of hexamers through a second, non-canonical binding site<sup>30</sup>. However,  
385 previous MD simulations have revealed that the interaction at this second site is  
386 weaker than the canonical binding site; we therefore did not focus on this second  
387 binding site. Nevertheless, as the binding is facilitated primarily by residues A220 and  
388 P222, both of which became more mobile upon H219 protonation in on our apo  
389 simulations (Figure 5A), it is conceivable that CypA binding at this second site may  
390 also be regulated by the H219Q mutation.

391

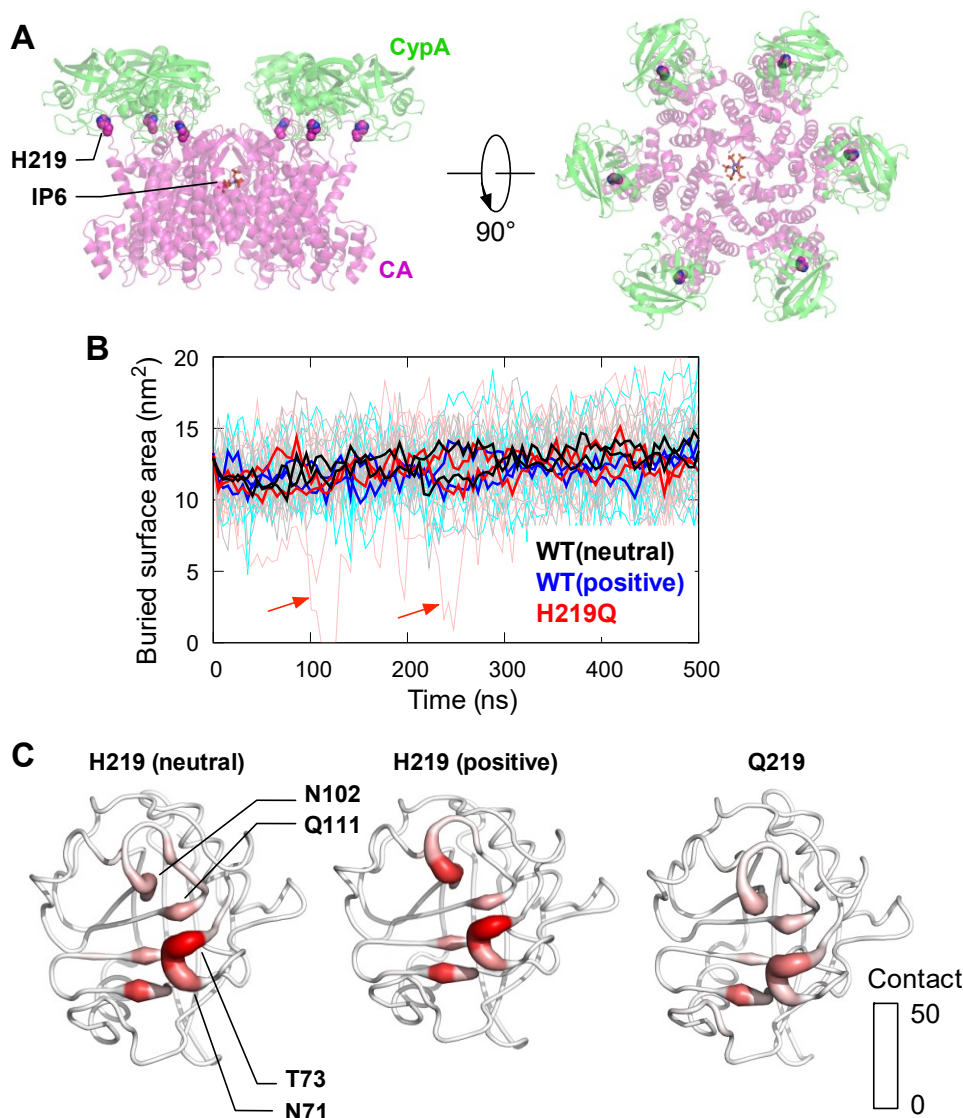

392  
 393 **Figure 6: Atomistic simulations of mature CA with CypA.** (A) Side and top views of mature CA  
 394 hexamer (PDB: 6BHT) with each subunit bound to CypA (aligned using PDB: 1AK4). Residue H219 is  
 395 shown in van der Waals representation, while IP6 bound in the center of the hexamer is shown in stick  
 396 representation. (B) Buried surface area between CA and CypA throughout 500 ns simulations. Data  
 397 taken from two independent simulations of CA with neutral H219 (black), protonated H219 (blue) and  
 398 H219Q mutant (red). Thin lines indicate values from each of the six subunits, whilst the thick lines show  
 399 the running averages. Red arrows show transient dissociation of CypA from CA in H219Q mutant  
 400 simulations. (C) Residues on CypA that made contacts specifically with the side chains of neutral and  
 401 protonated H219 (left and centre, respectively) from the WT CA simulations and Q219 (right) from the  
 402 mutant CA simulations. CypA is shown in ribbon representation, the colour and thickness of which  
 403 represent the percentage of contact made with CA during the simulations.

404

### 405 ***Mutation in the CA hexameric interface stabilizes oligomerisation***

406 Finally, another non-cleavage site mutation in the CA domain occurs at position 199,  
 407 in which a glutamine residue is mutated to a histidine<sup>14</sup>. In immature Gag, this residue



408 is located inside the CA domain pointing towards the internal cavity. Our CG  
409 simulations show that this residue did not form any major interactions with other CA  
410 residues as it was fully exposed to the solvent within the cavity of the CA. However,  
411 as CA undergoes large conformational changes during maturation, the Q199 residue  
412 forms a part of the hexameric interface of a mature CA domain (Figure 7A). This  
413 residue bridges the N-terminal domain of one CA subunit and the C-terminal domain  
414 of an adjacent subunit via polar interactions with residues such as Y301, K314 and  
415 Q311. We hypothesized that a mutation to histidine may alter the interactions between  
416 the two CA subdomains and therefore affect oligomerisation.

417 To test this hypothesis, we performed two repeat 500 ns atomistic simulations  
418 of mature CA for the WT and Q199H variants, the latter in either protonated or  
419 unprotonated states (Figure 7B). We found that both neutral and charged histidine  
420 retained all major interactions as observed for glutamine in the WT protein; for  
421 example, the two most prevalent interacting partners from the neighbouring subunit  
422 were Y301 and L343, via polar and van der Waals interactions, respectively. Similar  
423 to the WT simulations, these residues were found to interact with H199 throughout  
424 most of the trajectories. However, the mutant simulations also showed additional  
425 contacts with some residues compared to WT. Thus, neutral H199 made significantly  
426 more frequent interactions with K314 and V313, whilst protonated H199 could form a  
427 salt bridge with E319. Our simulations therefore suggest that a histidine residue at  
428 position 199 has the capability to interact with more residues in neighbouring subunits  
429 compared to WT, and thus potentially strengthen the binding interface between CA  
430 subunits to enhance the stability of the hexameric complex.

431

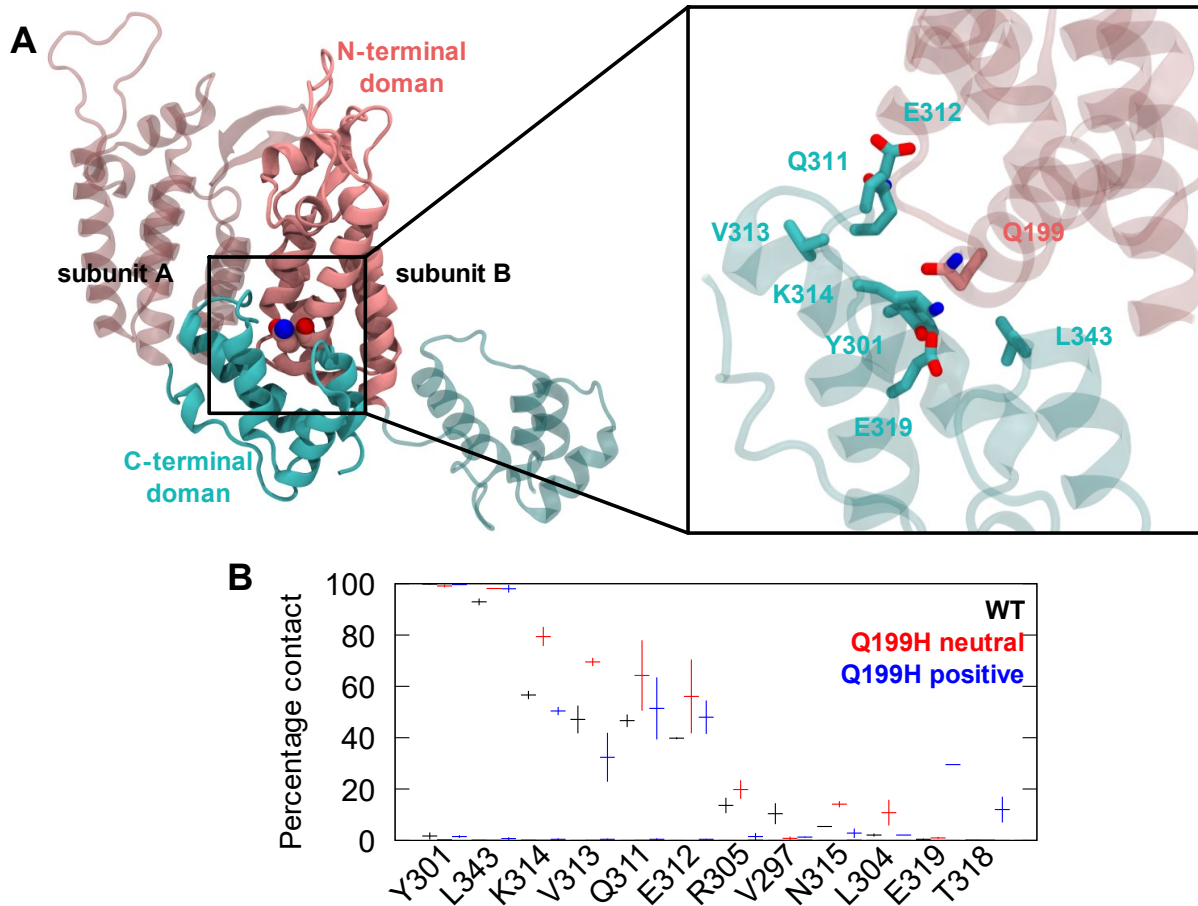

432

433 **Figure 7: The role of the Q199H mutation in CA oligomerisation.** (A) (Left) A representative  
434 snapshot of two subunits of the mature WT CA hexamer in cartoon representation. The Q199 residue  
435 bridging the N-terminal domain (pink) of one subunit and the C-terminal domain (cyan) of an adjacent  
436 subunit is shown in van der Waals representation. (Right) Enlarged image of the hexameric interface  
437 showing residues found within 0.4 nm of the Q199 residue. (B) Percentage contact made by residue  
438 Q199 (WT), neutral or positively charged H199 (mutants) with residues from adjacent CA subunits.  
439 Contacts are averaged over all six subunits and two independent simulations. Error bars indicate  
440 standard deviations between repeat simulations.

441

## 442 Discussion

443 Given the possible benefits of drugging Gag together with the protease, we set out to  
444 study cleaved Gag structures using multiscale modelling and simulations of the HIV-1  
445 Gag protein to understand the effect of clinically relevant mutations that occur outside  
446 of the cleavage sites. We built a model of the MA-CA-SP1 polyprotein complex in its  
447 multimeric state, which constitutes the largest cleavage product of the immature Gag  
448 protein. Our simulations of the membrane-bound complex suggest that the long linker  
449 connecting the MA and CA domains is flexible and may contract, enabling interactions  
450 between protease cleavage site residues and the C-terminal region of the MA domain,

451 as well as several regions on the CA domain including the CypA binding loop. Two  
452 clinical mutations, G123E and H219Q, are found in these regions and alter the  
453 accessibility and electrostatic properties of the protease binding site. Mutations in the  
454 MA domain are concentrated on the predicted membrane binding surface and at least  
455 three of them – E12K, E40K and L75R – render the surface more positively charged  
456 compared to wild type Gag. Our CG simulations of these mutant variants show more  
457 pronounced interactions with PIP2 lipids, leading to the hypothesis that these  
458 mutations improve Gag targeting and anchoring to the plasma membrane during viral  
459 assembly. Atomic-resolution simulations of the mature Gag CA domain showed that  
460 the H219Q mutation may play a role in optimizing CypA recruitment by controlling the  
461 conformational flexibility of the CypA binding loop and fine-tuning the CypA binding  
462 affinity. We also found that a mutation in the CA domain, Q199H, likely enhances  
463 oligomerisation by providing more stabilising interactions between adjacent subunits.

464 In the field of HIV and other related retroviruses, multiscale modelling and  
465 simulations have been utilised to study CA in different maturation states, providing  
466 important insights into their structural dynamics and interactions with drugs and host  
467 cell proteins<sup>30,46–48</sup>. For example, landmark microsecond-timescale atomic simulations  
468 of the entire HIV-1 capsid revealed important physicochemical properties, such as its  
469 electrostatics, dynamics, and water/ion permeability, as well as pointing towards long-  
470 range allosteric motions in the shell<sup>27</sup>. Simulations of the monomeric MA domain shed  
471 light on the molecular mechanism underlying membrane anchoring by the myristoyl  
472 group and PIP2 lipids<sup>33</sup>. Our study reports the first complete oligomeric model of the  
473 proteolytic product of HIV-1 Gag polyprotein, allowing the investigation of interactions  
474 between residues on the protease binding site and distant residues on the MA and CA  
475 domains, especially those from different subunits. Such inter-subunit “crosstalk” would  
476 be difficult to identify using individual crystal structures of mature Gag domains or a  
477 monomeric Gag model. Understanding structural changes that occur upon proteolysis  
478 could provide important clues on HIV-1 protease activity. For example, the MA-CA  
479 linker contraction observed in our simulations resulted in a significant decrease in  
480 solvent accessibility of the protease binding site, which helps to explain the lower  
481 cleavage rate of the MA-CA domain compared to the SP2-P6 domain<sup>38</sup>. From the  
482 perspective of anti-HIV drug development, targeting Gag proteolytic products in  
483 addition to the mature form, by virtue of identifying intermediate structural models, may  
484 allow for the discovery of Gag inhibitors that can inhibit multiple stages of maturation<sup>10</sup>.

485           Since accumulation of deleterious mutations could negatively impact virion  
486 survival, Gag polyprotein and protease co-compensate to outcompete protease  
487 inhibitors and restore viral fitness<sup>10,11,49</sup>. While HIV-1 protease acquires drug resistant  
488 mutations to evade PI activity, its ability to bind and subsequently cleave the Gag  
489 protein is impaired. Thus, Gag gains additional mutations to compensate for fitness  
490 defects to recover protease function. Structural studies show that associated  
491 mutations on cleavage sites do not restore interactions lost due to mutations on the  
492 protease, but rather establish novel interactions surrounding the site of protease  
493 mutations as well as induce conformational changes to drive better binding<sup>12</sup>. Apart  
494 from cleavage site mutations, mutations in more distant regions have been shown to  
495 contribute towards recovery from the reduced viral fitness caused by protease  
496 mutations<sup>13,14</sup>. Our study shows that these non-cleavage site mutations have far  
497 reaching implications outside of Gag proteolysis, from improving membrane binding  
498 to fine-tuning CypA recruitment and stabilising the CA hexamer. A recent single  
499 genome sequencing study revealed that, indeed, most Gag-protease correlated  
500 mutations occur outside of the Gag cleavage site with the viral MA and CA domains  
501 representing the largest subsets of the mutations<sup>49</sup>. Interestingly, a high concentration  
502 of compensatory mutations was uncovered within the globular domain of the MA,  
503 which binds to the plasma membrane, and the CypA binding loop of the CA, further  
504 corroborating our simulation results. Our results also highlight that the residues on the  
505 CypA binding loop can interact directly with MA-CA cleavage site residues, thus  
506 potentially influencing their local electrostatics and surface accessibility, although  
507 determining the exact interactions made between these residues and subsequent  
508 molecular effects would require further studies. For example, PS lipids are known to  
509 be exposed on the outer leaflet of HIV-1 membrane and may facilitate HIV-1 entry into  
510 the host cells<sup>50,51</sup>, and it is possible that the highly basic surface generated by the non-  
511 cleavage site mutations could attract anionic PS lipids, similarly to the PIP2 enrichment  
512 around the MA domain observed here. It is worth noting that compensatory non-  
513 cleavage site mutations also occur in the NC and P6 domains. Gatanaga et al.  
514 discovered five such mutations with clinical importance<sup>14</sup>, and many clinical drug  
515 resistant mutations can occur within the first replication cycle<sup>7</sup>. While modelling these  
516 domains is beyond the scope of the current study, it is certainly worth exploring in the  
517 future, specifically regarding how these mutations affect interactions with the viral RNA  
518 genome. Overall, our data have revealed new insights into the role of Gag non-

519 cleavage site mutations on HIV-1 viral fitness. Given that HIV-1 is one of the fastest  
520 mutating RNA viruses, an in-depth comprehension of emerging mutations will aid in  
521 the general understanding of viral drug resistance, as well as the emergence of novel  
522 viruses that are able to cross species during zoonotic infections.

523

524

## 525 **Methods**

### 526 ***Model building and system setup***

527 The model of HIV-1 Gag MA-CA-SP1 was built using two structural templates: MA  
528 trimers (PDB: 1HIW)<sup>34</sup> and the immature CA hexamer (PDB: 5L93)<sup>35</sup>. Six copies of  
529 MA trimers were arranged based on EM images showing that they organize as  
530 hexamer-of-trimers on a model membrane bilayer<sup>36</sup>. The CA hexamer was placed  
531 such that the N-termini of its subunits align with the C-termini of the central subunits  
532 of the MA trimers. Modeller version 9.21<sup>52</sup> was used to build the loops connecting the  
533 MA trimers and CA hexamer (Figure S1) using the discreet optimized protein energy  
534 (DOPE)-based loop modelling protocol, and the model with the lowest DOPE score  
535 was chosen<sup>53</sup>. Stereochemical assessment using Ramachandran analysis<sup>54</sup> showed  
536 only one outlier residue, confirming that the model was structurally reasonable. The  
537 atomistic MA-CA-SP1 structure was subsequently converted to CG representation  
538 using the MARTINI 2.2 force field<sup>55</sup> and the elastic network model, EINEDyn<sup>56</sup>, was  
539 imposed to maintain the integrity of the secondary and tertiary structure. The N-  
540 terminal glycine residue on each MA subunit was myristoylated based on parameters  
541 from Charlier et al<sup>33</sup>. Three mutant variants were generated using PyMOL<sup>57</sup> based on  
542 non-cleavage site mutations published by Gatanaga et al<sup>14</sup>.

543 A 30 x 30 nm<sup>2</sup> patch representing the HIV-1 membrane model was built using  
544 the CHARMM-GUI Martini Maker Bilayer Builder<sup>58,59</sup> and the lipid composition was  
545 based on a previous HIV-1 lipidomic study<sup>37</sup>. This membrane was asymmetric: the  
546 upper leaflet was made of 10% phosphatidyl choline (PC), 10% phosphatidyl ethanol  
547 amine (PE), 30% sphingomyelin, and 50% cholesterol, whereas the lower leaflet was  
548 made of 10% PC, 20% PE, 15% phosphatidyl serine (PS), 5% phosphatidylinositol-  
549 4,5-bisphosphate (PIP2), and 50% cholesterol. The HIV-1 membrane is enriched in  
550 saturated lipid species especially for PC; we therefore modelled the lipid tails of PC as  
551 1,2-dipalmitoyl (DP), whereas the rest of the lipids were modelled with 1-palmitoyl-2-  
552 oleoyl (PO) lipid tails. Following minimization and equilibration procedures according  
553 to the CHARMM-GUI, the model membrane was further simulated for 1  $\mu$ s to allow  
554 better mixing of the lipid components prior to simulations in the presence of protein.

555

### 556 ***Molecular dynamics simulations***

557 The HIV-1 Gag MA-CA-SP1 CG model was placed underneath the membrane  
558 such that the myristoylated N-termini were inserted into lower leaflet of the membrane.

559 Energy minimization was then performed using the steepest descent method to  
560 remove any overlapping beads. The system was solvated with standard MARTINI  
561 water molecules and neutralized with 0.15 M NaCl ions. Further energy minimization  
562 was performed. The system was then equilibrated for 10 ns whereby positional  
563 restraints with a force constant of 1000 kJ mol<sup>-1</sup> nm<sup>-2</sup> were imposed on all of the  
564 backbone atoms of the protein. Temperature coupling using the V-rescale thermostat  
565 with a time constant of 1 ps<sup>60</sup> was applied to maintain the temperature at 310 K. Semi-  
566 isotropic pressure coupling using the Berendsen barostat with a time constant of 5 ps  
567 was utilized to maintain the pressure of the system at 1 atm. Electrostatics were  
568 calculated using the reaction field method. The der Waals interactions were computed  
569 using a potential shift Verlet scheme. The short-range cut-offs for both of these were  
570 set to 1.1 nm. After the equilibration simulations, four independent production runs of  
571 15  $\mu$ s were performed using different distributions of initial velocities. The same  
572 protocols used for the equilibration simulation were used for the production runs in the  
573 absence of position restraints, except for the pressure coupling in which the Parrinello-  
574 Rahman barostat was used with a coupling constant of 12.0 ps<sup>61</sup>.

575 Atomistic MD simulations were performed to understand the role of the H219Q  
576 mutations on CypA binding and Q199H on CA oligomerisation. The structure of the  
577 mature HIV-1 CA hexamer in complex with inositol IP6 (PDB: 6BHT)<sup>32</sup> was aligned to  
578 that of the CA N-terminal domain bound to CypA (PDB: 1AK4)<sup>43</sup>. This alignment  
579 generated a structure of the CA hexamer bound to six copies of CypA (Figure 6A).  
580 Mutations in the CA were performed using PyMOL. The proteins were parameterized  
581 using the CHARMM36 force field<sup>62</sup>, whereas the CHARMM-GUI Ligand Reader &  
582 Modeller<sup>63</sup> was used to generate the parameters for the IP6 molecule. The complex  
583 was solvated with TIP3P water molecules and 0.15 M NaCl was added to neutralize  
584 the system. The steepest descent minimization protocol was used to remove  
585 overlapping atoms. A short 100 ps equilibration simulation with position restraints  
586 (force constant of 1000 kJ mol<sup>-1</sup> nm<sup>-2</sup>) applied to all heavy atoms of the protein was  
587 conducted. The temperature of the system was maintained at 310 K using the Nosé-  
588 Hoover thermostat with a time constant of 1.0 ps<sup>64,65</sup>. The pressure was kept at 1 atm  
589 using an isotropic coupling to the Parrinello-Rahman barostat with a time constant of  
590 5.0 ps<sup>61</sup>. Electrostatic interactions were measured using the smooth particle mesh  
591 Ewald (PME) method with a real-space cut off of 1.2 nm<sup>66</sup>. The van der Waals  
592 interactions were calculated using the force switch smoothing function applied

593 between 1.0 and 1.2 nm, and truncated at 1.2 nm. An integration time step of 2 fs was  
594 used with all covalent bonds involving hydrogens constrained using the LINCS  
595 algorithm<sup>67</sup>. After equilibration, the positional restraints were removed and two  
596 independent 500 ns production runs were conducted using the same setup for each  
597 of the WT and mutant variants starting with different initial velocities.

598 Additional atomistic and CG simulations were performed to verify the  
599 conformation of the MA-CA linker. A single subunit of the HIV-1 Gag MA-CA-SP1  
600 model was placed in solution with 0.15 M NaCl ions. Positional restraints with a force  
601 constant of 1000 kJ mol<sup>-1</sup> nm<sup>-2</sup> were applied to the backbone atoms of membrane  
602 binding residues (residue 2-53 and 72-90) to mimic membrane binding. Four  
603 independent 500 ns simulations were performed for both atomistic and CG systems  
604 using the same protocols described above.

605 To refine interactions between the linker region and mutant residues observed  
606 in the CG simulations of the MA-CA-SP1 hexamer, we converted the structure of the  
607 hexamer from the final frame of one of the simulations to atomistic representation  
608 using the CHARMM-GUI All-Atom Converter<sup>68</sup>. A single subunit of the MA-CA-SP1  
609 was subsequently used to refine interactions with the G123E mutant, whereas two  
610 adjacent subunits were used for interactions with the H219Q mutant. The protein was  
611 inserted into a box of water with 0.15 M NaCl ions. Positional restraints with a force  
612 constant of 1000 kJ mol<sup>-1</sup> nm<sup>-2</sup> were imposed on the backbone atoms of residues  
613 outside of the MA-CA linker and CypA binding loop (residue 2-117, 147-215 and 233-  
614 376). For each system, three independent 200 ns simulations were performed using  
615 the parameters described above.

616 All simulations were performed using GROMACS 2018<sup>69</sup>. The list of simulations  
617 performed is provided in Table S2. Analysis of the electrostatic surface charge of the  
618 MA domain was performed in PyMOL using the APBS plugin<sup>70</sup>.

619  
620



621 **Acknowledgments**

622 This work was supported by BII and EDDC of A\*STAR. Simulations were performed  
623 on the petascale computer cluster ASPIRE-1 at the National Supercomputing Centre  
624 of Singapore (NSCC) and the A\*STAR Computational Resource Centre (A\*CRC).

625

626

## 627 References

- 628 1. Yeo, J. Y., Goh, G. R., Tran-To Su, C. & Ken-En Gan, S. The determination of  
629 HIV-1 RT mutation rate, its possible allosteric effects, and its implications on  
630 drug resistance. *Viruses* **12**, 1–22 (2020).
- 631 2. Duffy, S., Shackelton, L. A. & Holmes, E. C. Rates of evolutionary change in  
632 viruses: Patterns and determinants. *Nat. Rev. Genet.* **9**, 267–276 (2008).
- 633 3. Li, W. *et al.* Bats are natural reservoirs of SARS-like coronaviruses. *Science*  
634 (80- ). **310**, 676–679 (2005).
- 635 4. Kuiken, T. *et al.* Host species barriers to influenza virus infections. *Science*  
636 (80- ). **312**, 394–397 (2006).
- 637 5. Wu, F. *et al.* A new coronavirus associated with human respiratory disease in  
638 China. *Nature* (2020). doi:10.1038/s41586-020-2008-3
- 639 6. Zhou, P. *et al.* A pneumonia outbreak associated with a new coronavirus of  
640 probable bat origin. *Nature* **2019**, (2020).
- 641 7. Yi Yeo, J., Yap, P., Goh, G., Koh, D. W. & Gan, S. K. HIV-1 mutations in HIV-1  
642 Gag , protease , RT p66 and when they appear : Insights from an in vitro BSL2  
643 assay on mutation rates and types . *bioRxiv* 1–26 (2020).
- 644 8. Perelson, A. S. Modelling viral and immune system dynamics. *Nat. Rev.*  
645 *Immunol.* **2**, 28–36 (2002).
- 646 9. Su, C. T. T., Ling, W. L., Lua, W. H., Haw, Y. X. & Gan, S. K. E. Structural  
647 analyses of 2015-updated drug-resistant mutations in hiv-1 protease: An  
648 implication of protease inhibitor cross-resistance. *BMC Bioinformatics* **17**,  
649 (2016).
- 650 10. Su, C. T.-T., Koh, D. W.-S. & Gan, S. K.-E. Reviewing HIV-1 Gag Mutations in  
651 Protease Inhibitors Resistance: Insights for Possible Novel Gag Inhibitor  
652 Designs. *Molecules* **24**, 3243 (2019).
- 653 11. Clavel, F. & Mammano, F. Role of gag in HIV resistance to protease inhibitors.  
654 *Viruses* **2**, 1411–1426 (2010).
- 655 12. Özen, A., Lin, K. H., Yilmaz, N. K. & Schiffer, C. A. Structural basis and distal  
656 effects of Gag substrate coevolution in drug resistance to HIV-1 protease.  
657 *Proc. Natl. Acad. Sci. U. S. A.* **111**, 15993–15998 (2014).
- 658 13. Myint, L. *et al.* Gag Non-Cleavage Site Mutations Contribute to Full Recovery  
659 of Viral Fitness in Protease Inhibitor-Resistant Human Immunodeficiency Virus  
660 Type 1. *Antimicrob. Agents Chemother.* **48**, 444–452 (2004).

- 661 14. Gatanaga, H. *et al.* Amino acid substitutions in Gag protein at non-cleavage  
662 sites are indispensable for the development of a high multitude of HIV-1  
663 resistance against protease inhibitors. *J. Biol. Chem.* **277**, 5952–5961 (2002).
- 664 15. Su, C. T. T., Kwoh, C. K., Verma, C. S. & Gan, S. K. E. Modeling the full length  
665 HIV-1 Gag polyprotein reveals the role of its p6 subunit in viral maturation and  
666 the effect of non-cleavage site mutations in protease drug resistance. *J.*  
667 *Biomol. Struct. Dyn.* **36**, 4366–4377 (2018).
- 668 16. Bell, N. M. & Lever, A. M. L. HIV Gag polyprotein: Processing and early viral  
669 particle assembly. *Trends Microbiol.* **21**, 136–144 (2013).
- 670 17. Franke, E. K., Yuan, H. E. H. & Luban, J. Specific incorporation of cyclophilin a  
671 into HIV-1 virions. *Nature* **372**, 359–362 (1994).
- 672 18. Braaten, D., Franke, E. K. & Luban, J. Cyclophilin A is required for an early  
673 step in the life cycle of human immunodeficiency virus type 1 before the  
674 initiation of reverse transcription. *J. Virol.* **70**, 3551–60 (1996).
- 675 19. Carnes, S. K., Sheehan, J. H. & Aiken, C. Inhibitors of the HIV-1 capsid, a  
676 target of opportunity. *Curr. Opin. HIV AIDS* **13**, 359–365 (2018).
- 677 20. Purdy, M. D. *et al.* MicroED structures of HIV-1 Gag CTD-SP1 reveal binding  
678 interactions with the maturation inhibitor bevirimat. *Proc. Natl. Acad. Sci. U. S.*  
679 *A.* **115**, 13258–13263 (2018).
- 680 21. Seclén, E. *et al.* High prevalence of natural polymorphisms in Gag (CA-SP1)  
681 associated with reduced response to Bevirimat, an HIV-1 maturation inhibitor.  
682 *AIDS* **24**, 467–469 (2010).
- 683 22. Verheyen, J. *et al.* High prevalence of bevirimat resistance mutations in  
684 protease inhibitor-resistant HIV isolates. *Aids* **24**, 669–673 (2010).
- 685 23. Marzinek, J. K., Huber, R. G. & Bond, P. J. Multiscale modelling and simulation  
686 of viruses. *Current Opinion in Structural Biology* (2020).  
687 doi:10.1016/j.sbi.2019.12.019
- 688 24. Ayton, G. S., Noid, W. G. & Voth, G. Multiscale modeling of biomolecular  
689 systems: in serial and in parallel. *Curr. Opin. Struct. Biol.* **17**, 192–8 (2007).
- 690 25. Grime, J. M. A. & Voth, G. A. Early stages of the HIV-1 capsid protein lattice  
691 formation. *Biophys. J.* **103**, 1774–1783 (2012).
- 692 26. Grime, J. M. A. *et al.* Coarse-grained simulation reveals key features of HIV-1  
693 capsid self-assembly. *Nat. Commun.* **7**, 11568 (2016).
- 694 27. Perilla, J. R. & Schulten, K. Physical properties of the HIV-1 capsid from all-

- 695 atom molecular dynamics simulations. *Nat. Commun.* **8**, (2017).
- 696 28. Pak, A. J. *et al.* Immature HIV-1 lattice assembly dynamics are regulated by  
697 scaffolding from nucleic acid and the plasma membrane. *Proc. Natl. Acad. Sci.*  
698 *U. S. A.* **114**, E10056–E10065 (2017).
- 699 29. Pak, A. J., Grime, J. M. A., Yu, A. & Voth, G. A. Off-Pathway Assembly: A  
700 Broad-Spectrum Mechanism of Action for Drugs That Undermine Controlled  
701 HIV-1 Viral Capsid Formation. *J. Am. Chem. Soc.* **141**, 10214–10224 (2019).
- 702 30. Liu, C. *et al.* Cyclophilin A stabilizes the HIV-1 capsid through a novel non-  
703 canonical binding site. *Nat. Commun.* **7**, (2016).
- 704 31. Huang, P.-T. *et al.* FEZ1 Is Recruited to a Conserved Cofactor Site on Capsid  
705 to Promote HIV-1 Trafficking. *Cell Rep.* **28**, 2373-2385.e7 (2019).
- 706 32. Dick, robert A. *et al.* Inositol phosphates are assembly co-factors for HIV-1.  
707 *Nature* **560**, 509–512 (2018).
- 708 33. Charlier, L. *et al.* Coarse-grained simulations of the HIV-1 matrix protein  
709 anchoring: Revisiting its assembly on membrane domains. *Biophys. J.* **106**,  
710 577–585 (2014).
- 711 34. Hill, C. P., Worthylake, D., Bancroft, D. P., Christensen, A. M. & Sundquist, W.  
712 I. Crystal structures of the trimeric human immunodeficiency virus type 1  
713 matrix protein: implications for membrane association and assembly. *Proc.*  
714 *Natl. Acad. Sci. U. S. A.* **93**, 3099–104 (1996).
- 715 35. Schur, F. K. M. *et al.* An atomic model of HIV-1 capsid-SP1 reveals structures  
716 regulating assembly and maturation. *Science (80-. )*. **353**, 506–508 (2016).
- 717 36. Alfadhli, A., Barklis, R. L. & Barklis, E. HIV-1 matrix organizes as a hexamer of  
718 trimers on membranes containing phosphatidylinositol-(4,5)-bisphosphate.  
719 *Virology* **387**, 466–472 (2009).
- 720 37. Brugger, B. *et al.* The HIV lipidome: A raft with an unusual composition. *Proc.*  
721 *Natl. Acad. Sci.* **103**, 2641–2646 (2006).
- 722 38. Pettit, S. C. *et al.* The p2 domain of human immunodeficiency virus type 1 Gag  
723 regulates sequential proteolytic processing and is required to produce fully  
724 infectious virions. *J. Virol.* **68**, 8017–27 (1994).
- 725 39. Ono, A., Ablan, S. D., Lockett, S. J., Nagashima, K. & Freed, E. O.  
726 Phosphatidylinositol (4,5) bisphosphate regulates HIV-1 Gag targeting to the  
727 plasma membrane. *Proc. Natl. Acad. Sci. U. S. A.* **101**, 14889–14894 (2004).
- 728 40. Saad, J. S. *et al.* Structural basis for targeting HIV-1 Gag proteins to the

- 729 plasma membrane for virus assembly. *Proc. Natl. Acad. Sci.* **101**, 14889–  
730 14894 (2006).
- 731 41. Ono, A. & Freed, E. O. Plasma membrane rafts play a critical role in HIV-1  
732 assembly and release. *Proc. Natl. Acad. Sci. U. S. A.* **98**, 13925–13930  
733 (2001).
- 734 42. Thali, M. *et al.* Functional association of cyclophilin a with HIV-1 virions. *Nature*  
735 **372**, 363–365 (1994).
- 736 43. Gamble, T. R. *et al.* Crystal structure of human cyclophilin A bound to the  
737 amino-terminal domain of HIV-1 capsid. *Cell* **87**, 1285–1294 (1996).
- 738 44. Yin, L., Braaten, D. & Luban, J. Human immunodeficiency virus type 1  
739 replication is modulated by host cyclophilin A expression levels. *J. Virol.* **72**,  
740 6430–6 (1998).
- 741 45. Yezid, H., Konate, K., Debaisieux, S., Bonhoure, A. & Beaumelle, B.  
742 Mechanism for HIV-1 tat insertion into the endosome membrane. *J. Biol.*  
743 *Chem.* **284**, 22736–22746 (2009).
- 744 46. Zhao, G. *et al.* Mature HIV-1 capsid structure by cryo-electron microscopy and  
745 all-atom molecular dynamics. *Nature* **497**, 643–646 (2013).
- 746 47. Ayton, G. S. & Voth, G. A. Multiscale computer simulation of the immature  
747 HIV-1 virion. *Biophys. J.* **99**, 2757–2765 (2010).
- 748 48. Goh, B. C. *et al.* Atomic Modeling of an Immature Retroviral Lattice Using  
749 Molecular Dynamics and Mutagenesis. *Structure* **23**, 1414–1425 (2015).
- 750 49. Codoñer, F. M. *et al.* Gag-protease coevolution analyses define novel  
751 structural surfaces in the HIV-1 matrix and capsid involved in resistance to  
752 Protease Inhibitors. *Sci. Rep.* **7**, (2017).
- 753 50. Callahan, M. K. *et al.* Phosphatidylserine on HIV Envelope Is a Cofactor for  
754 Infection of Monocytic Cells. *J. Immunol.* **170**, 4840–4845 (2003).
- 755 51. Zaitseva, E. *et al.* Fusion Stage of HIV-1 Entry Depends on Virus-Induced Cell  
756 Surface Exposure of Phosphatidylserine. *Cell Host Microbe* **22**, 99-110.e7  
757 (2017).
- 758 52. Sali, A. & Blundell, T. Comparative protein modelling by satisfaction of spatial  
759 restraints. *J. Mol. Biol.* **234**, 779–815 (1994).
- 760 53. Shen, M., Devos, D., Melo, F. & Sali, A. A composite score for predicting  
761 errors in protein structure models. *Protein Sci.* **15**, 1653–1666 (2006).
- 762 54. Ramachandran, G. N., Ramakrishnan, C. & Sasisekharan, V. Stereochemistry

- 763 of polypeptide chain configurations. *J. Mol. Biol.* **7**, 95–99 (1963).
- 764 55. Monticelli, L. *et al.* The MARTINI coarse-grained force field: Extension to  
765 proteins. *J. Chem. Theory Comput.* **4**, 819–834 (2008).
- 766 56. Periole, X., Cavalli, M., Marrink, S. & Ceruso, M. A. Combining an Elastic  
767 Network With a Coarse-Grained Molecular Force Field : Structure , Dynamics ,  
768 and Intermolecular Recognition. *J. Chem. Theory Comput.* **5**, 2531–2543  
769 (2009).
- 770 57. DeLano, W. The PyMOL molecular graphics system. (2002).
- 771 58. Jo, S., Lim, J. B., Klauda, J. B. & Im, W. CHARMM-GUI membrane builder for  
772 mixed bilayers and its application to yeast membranes. *Biophys. J.* **97**, 50–58  
773 (2009).
- 774 59. Qi, Y. *et al.* CHARMM-GUI Martini Maker for Coarse-Grained Simulations with  
775 the Martini Force Field. *J. Chem. Theory Comput.* **11**, 4486–4494 (2015).
- 776 60. Bussi, G., Donadio, D. & Parrinello, M. Canonical sampling through velocity  
777 rescaling. *J. Chem. Phys.* **126**, 014101 (2007).
- 778 61. Parrinello, M. & Rahman, A. Polymorphic Transitions in Single Crystals: a New  
779 Molecular Dynamics Method. *J. Appl. Phys.* **52**, 7182–7190 (1981).
- 780 62. Huang, J. & MacKerell, A. D. CHARMM36 all-atom additive protein force field:  
781 Validation based on comparison to NMR data. *J. Comput. Chem.* **34**, 2135–  
782 2145 (2013).
- 783 63. Kim, S. *et al.* CHARMM-GUI ligand reader and modeler for CHARMM force  
784 field generation of small molecules. *J. Comput. Chem.* **38**, 1879–1886 (2017).
- 785 64. Hoover, W. G. Canonical dynamics: Equilibrium phase-space distributions.  
786 *Phys. Rev. A* **31**, 1695–1697 (1985).
- 787 65. Nosé, S. A molecular dynamics method for simulations in the canonical  
788 ensemble. *Mol. Phys.* **52**, 255–268 (1984).
- 789 66. Essmann, U. *et al.* A smooth particle mesh Ewald method. *J. Chem. Phys.*  
790 **103**, 8577 (1995).
- 791 67. Hess, B., Bekker, H., Berendsen, H. J. C. & Fraaije, J. G. E. M. LINCS: A  
792 linear constraint solver for molecular simulations. *J. Comp. Chem.* **18**, 1463–  
793 1472 (1997).
- 794 68. Wassenaar, T. A., Pluhackova, K., Böckmann, R. A., Marrink, S. J. &  
795 Tieleman, D. P. Going backward: A flexible geometric approach to reverse  
796 transformation from coarse grained to atomistic models. *J. Chem. Theory*

- 797            *Comput.* **10**, 676–690 (2014).
- 798    69.    Abraham, M. J. *et al.* Gromacs: High performance molecular simulations  
799            through multi-level parallelism from laptops to supercomputers. *SoftwareX* **1–**  
800            **2**, 19–25 (2015).
- 801    70.    Baker, N. A., Sept, D., Joseph, S., Holst, M. J. & McCammon, J. A.  
802            Electrostatics of nanosystems: application to microtubules and the ribosome.  
803            *Proc. Natl. Acad. Sci. U.S.A.* **98**, 10037–41 (2001).
- 804
